# Supplementary material
Source: publisher site journal article supplement (http://e-cmh.org/upload/media/cmh-2023-0287-Supplementary-1.pdf)
Supplement: Supplementary file 1 [file cmh-2023-0287-Supplementary-1.pdf]

## Machine learning code

### Dataset

```
library(DMwR)
TACR <- knnImputation(TACRall) # missing data imputation by KNN
n<-0.3*nrow(TACR) # split dataset
test.index<-sample(1:nrow(TACR),n)
TACR1<-TACR[-test.index,]
TACR2<-TACR[test.index,]
train <- TACR1 # training dataset
test <- TACR2 # validation dataset
```

### Decision tree

```
library(rpart)
train$SVR <-as.factor(train$SVR)
test$SVR <- as.factor(test$SVR)
fit <- rpart(SVR ~ .,data = train, control = rpart.control(minsplit = 3, cp = 0.001, maxdepth = 15))
pred <- predict(fit, test, type = "prob")
```

### Artificial neural networks

```
library(neuralnet)
nn <- neuralnet(SVR ~ ., train, hidden = 1, threshold = 0.01, stepmax = 1e+05, rep = 1, algorithm = "rprop+", linear.output = FALSE)
pred <- predict(nn, test)
```

### Random forest

```
library(randomForest)
train$SVR <-as.factor(train$SVR)
fit <- randomForest(train$SVR ~ ., data=train, ntree=500, mtree=7, nodesize=1, maxnodes = NULL, importance=TRUE, proximity=TRUE)
pred <- predict(fit, type="prob", test[,1:55])
```

### XGBoost

```
library(xgboost)
## binary classification
bst <- xgboost(data = as.matrix(train[,-56]), label = train$SVR, max_depth =5, eta = 0.5, nthread = 2, nrounds = 200 , objective = "binary:logistic")
pred <- predict(bst, as.matrix(test[,-56]))
```

```
library(ggplot2)
```

```
## Plot feature importance as a bar graph
```

```
bst <- xgboost(data = as.matrix(TACRall[,-56]), label = TACRall$SVR, max_depth =5, eta = 0.5, nthread = 2, nrounds = 200 , objective = "binary:logistic")
```

```
importance_matrix <- xgb.importance(colnames(as.matrix(TACRall[,-56])), model = bst)
xgb.plot.importance(importance_matrix, rel_to_first = TRUE, xlab = "Relative importance")
gg <- xgb.ggplot.importance(importance_matrix, measure = "Frequency", rel_to_first = TRUE)
gg + ggplot2::ylab("Frequency")
```

```
##SHAP contribution dependency plots
```

```
xgb.plot.shap(as.matrix(TACRall[,-56]), model = bst, features = "logHCV_RNA")
contr <- predict(bst, as.matrix(TACRall[,-56]), predcontrib = TRUE)
xgb.plot.shap(as.matrix(TACRall[,-56]), contr, model = bst, top_n = 12, n_col = 3)
```

```
## SHAP summary plot
```

```
xgb.ggplot.shap.summary(as.matrix(TACRall[,-56]), contr, model = bst, top_n = 12)
```
